# Supplementary material for: Electrospun magnetic CoFe2O4/Ag hybrid nanotubes for sensitive SERS detection and monitoring of the catalytic degradation of organic pollutants
Source: Royal Society of Chemistry journal article supplement (doi:10.1039/c7ra07786f), 2017-01-01
Supplement: c7ra07786f1.pdf [file c7ra07786f1.pdf]

**Electronic Supplementary Information**

**Electrospun magnetic CoFe<sub>2</sub>O<sub>4</sub>/Ag hybrid nanotubes for sensitive SERS detection  
and monitoring of the catalytic degradation of organic pollutants**

Wei Song,<sup>\*a</sup> Zezhou Yang<sup>b</sup>, Fuqiu Ma<sup>c</sup>, Maoqiang Chi,<sup>b</sup> Bing Zhao,<sup>a</sup> Xiaofeng Lu,<sup>\*b</sup>

<sup>a</sup>*State Key Laboratory of Supramolecular Structure and Materials, Jilin University,  
Changchun 130012, P. R. China*

<sup>b</sup>*Alan G. MacDiarmid Institute, College of Chemistry, Jilin University, Changchun,  
130012, P. R. China.*

*\*Corresponding authors:*

*Fax & Tel.: +86-431-85168473; E-mail: [weisong@jlu.edu.cn](mailto:weisong@jlu.edu.cn); [xflu@jlu.edu.cn](mailto:xflu@jlu.edu.cn)*

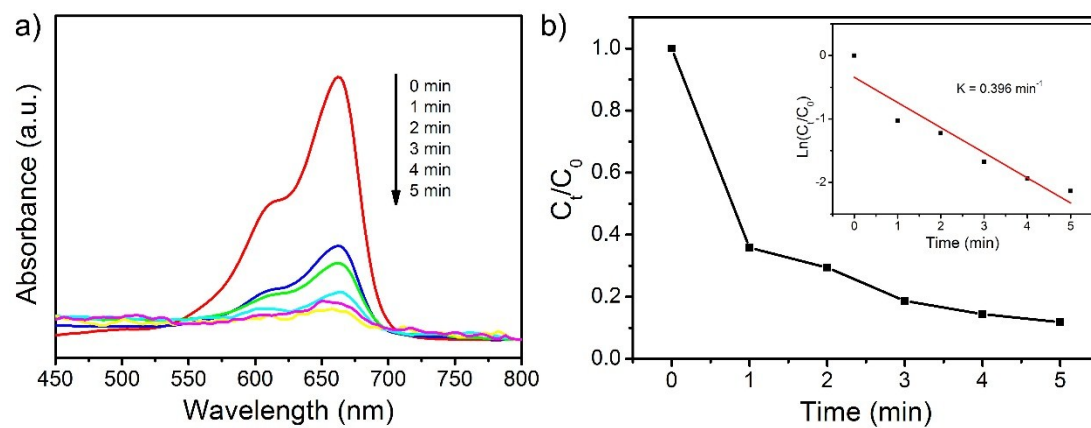

**Fig. S1** a) Successive UV-vis absorption spectra of MB aqueous solution in the presence of  $\text{CoFe}_2\text{O}_4/\text{Ag}$  hybrid nanotubes and  $\text{NaBH}_4$ ; b) The relationship between  $C_t/C_0$  and the reaction time. The inset shows the relationship between  $\ln(C_t/C_0)$  and reaction time.

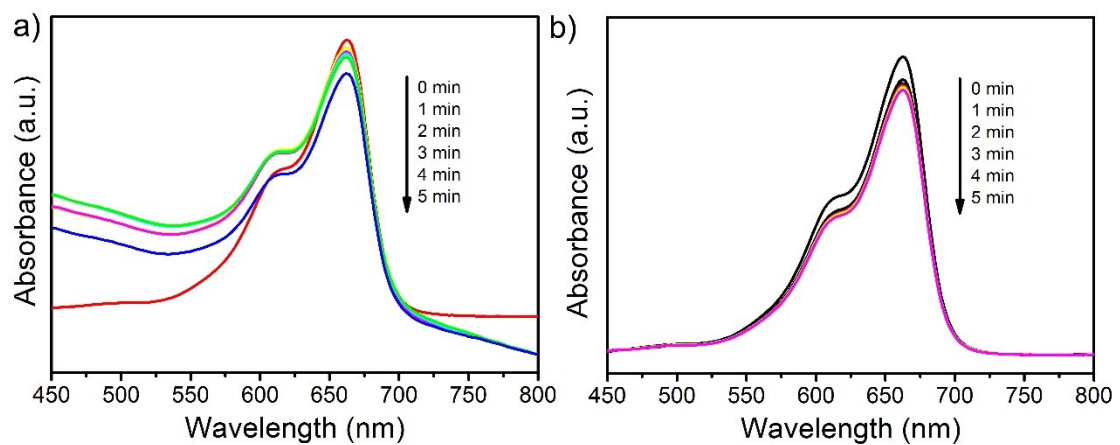

**Fig. S2** a) Successive UV-vis absorption spectra of MB aqueous solution in the presence of individual electrospun  $\text{CoFe}_2\text{O}_4$  nanotubes and  $\text{NaBH}_4$ ; b) Successive UV-vis absorption spectra of MB aqueous solution in the presence of individual electrospun Ag nanomaterials and  $\text{NaBH}_4$ .
